# Supplementary material for: Characterizing programmed cell death features in osteoarthritis through integrative multiomics and machine learning analysis
Source: PeerJ. 2025 Oct 10;13:e20104. doi: 10.7717/peerj.20104 (PMC12517281; doi:10.7717/peerj.20104)
Supplement: Supplemental Information 3 [file peerj-13-20104-s003.xlsx]

## Sheet: Sheet1
Figure 8A-Cell viability (OD470)			Figure 8B-Hyaluronan (ng/ml)			Figure 8C-Expression of TNFα (pg/ml)			Figure 8C-Expression of IL6 (pg/ml)
Control	Hypoxia		Control	Hypoxia		Control	Hypoxia		Control	Hypoxia
1.1	0.555		584	223		165	761		61	474
0.821	0.633		684	314		126	649		129	659
0.929	0.487		538	316		86	710		46	642
0.931	0.42		611	392		129	745		67	508
1.026	0.434		638	357		83	768		76	588
0.977	0.684		747	238		94	672		118	646
0.904	0.311		517	398		109	864		88	413
0.86	0.315		731	262		162	862		104	343
0.826	0.575		687	363		90	695		96	431
Figure8D-Relative expression of mRNA
	Control										Hypoxia
FASN	1.154	0.997	1.097	1.145	0.826	0.848	0.906	1.013	0.905		0.389	0.445	0.472	0.3	0.433	0.598	0.376	0.405	0.353
S100A9	1.104	1.103	1.028	1.1	1.068	0.855	1.131	1.163	0.952		2.471	2.433	2.433	2.438	2.506	2.52	2.522	2.55	2.446
PMAIP1	1.108	0.804	0.821	1.117	1.143	1.031	1.11	1.087	0.951		2.949	3.092	3.134	2.803	3.085	3.078	2.952	3.085	3.156
EDA2R	0.852	0.969	1.189	1.173	1.103	1.122	0.828	0.862	1.01		2.092	2.381	2.054	2.05	2.078	2.245	2.262	2.152	1.834
Figure8E-Relative expression of FASN mRNA				Figure8E-Relative expression of S100A9 mRNA					Figure8E-Relative expression of PMAIP1 mRNA				Figure8E-Relative expression of EDA2R mRNA
Control	OE-NC	OE-FASN		Control	si-NC	si-S100A9		Control	si-NC	si-PMAIP1		Control	si-NC	si-EDA2R
1.01	0.916	1.826		0.942	1.101	0.472		1.165	1.096	0.457		0.913	0.84	0.246
1.061	0.863	1.983		1.019	1.061	0.468		1.159	0.842	0.424		1.024	1.129	0.219
0.891	0.854	2.022		0.833	0.948	0.487		1.041	1.083	0.366		0.886	0.963	0.26
1.152	0.846	1.867		1.092	1.075	0.432		1.015	0.939	0.373		1.113	0.907	0.247
0.861	0.826	2.024		1.098	0.943	0.493		0.974	0.895	0.427		1.191	1.017	0.208
0.883	0.934	2.078		0.996	0.814	0.584		1.024	0.998	0.38		1.147	1.075	0.29
1.163	1.086	2.181		0.879	1.137	0.519		0.841	0.916	0.449		1.063	0.815	0.301
1.008	1.082	2.115		0.947	1.107	0.474		1.053	1.129	0.498		1.128	0.826	0.31
0.994	1.17	2.194		1.156	0.978	0.567		0.998	1.2	0.386		1.143	1.149	0.339
Figure8F-Cell viability (OD470)
Control	Hypoxia	OE-FASN		Control	Hypoxia	si-S100A9		Control	Hypoxia	si-PMAIP1		Control	Hypoxia	si-EDA2R
0.989	0.458	0.776		0.853	0.639	0.767		0.959	0.332	0.777		0.959	0.607	0.669
0.926	0.639	0.742		1.023	0.482	0.787		1.087	0.383	0.786		0.813	0.406	0.702
0.985	0.564	0.736		1.072	0.628	0.656		1.129	0.329	0.707		0.83	0.655	0.731
1.052	0.683	0.752		1.114	0.473	0.745		0.907	0.607	0.764		0.885	0.335	0.73
0.834	0.596	0.706		0.872	0.682	0.762		0.825	0.377	0.725		0.932	0.421	0.708
1.166	0.496	0.752		1.07	0.697	0.676		0.849	0.588	0.763		1.084	0.486	0.657
0.913	0.343	0.675		0.843	0.345	0.611		0.893	0.502	0.753		1.124	0.607	0.708
0.814	0.305	0.74		0.989	0.506	0.749		0.982	0.411	0.651		0.825	0.495	0.71
0.95	0.441	0.709		1.127	0.434	0.711		1.104	0.575	0.704		0.862	0.594	0.663
Figure8G-Hyaluronan (ng/ml)
Control	Hypoxia	OE-FASN		Control	Hypoxia	si-S100A9		Control	Hypoxia	si-PMAIP1		Control	Hypoxia	si-EDA2R
613	268	564		776	229	411		566	325	346		628	283	318
620	351	385		744	387	409		593	295	264		575	294	543
570	398	370		502	371	383		637	247	481		710	297	415
604	328	220		617	271	509		658	252	414		754	261	553
612	287	347		613	207	443		619	224	361		721	373	343
654	218	457		644	374	614		731	203	570		542	201	489
620	279	616		684	364	223		548	298	259		762	239	208
544	262	293		580	341	417		735	238	567		716	248	532
550	374	208		616	293	427		506	391	313		584	265	483
Figure8H-Expression of TNFα (pg/ml)
Control	Hypoxia	OE-FASN		Control	Hypoxia	si-S100A9		Control	Hypoxia	si-PMAIP1		Control	Hypoxia	si-EDA2R
99	721	437		167	745	200		147	783	476		156	887	272
173	893	260		133	640	494		83	654	421		76	897	267
119	623	446		142	721	280		121	684	408		172	702	404
137	635	210		136	866	357		65	703	467		149	702	367
165	614	337		105	615	394		111	859	424		108	643	466
150	695	450		144	798	411		112	780	446		79	812	238
111	843	406		58	862	400		131	674	238		120	629	269
131	709	434		136	742	498		152	633	416		161	783	407
91	886	335		122	800	397		104	892	317		146	658	437
Figure8I-Expression of IL6 (pg/ml)
Control	Hypoxia	OE-FASN		Control	Hypoxia	si-S100A9		Control	Hypoxia	si-PMAIP1		Control	Hypoxia	si-EDA2R
46	483	374		129	517	216		121	411	310		49	556	330
123	528	242		81	578	195		111	467	324		79	593	287
49	698	198		86	468	292		118	686	197		90	395	307
96	379	299		54	516	383		92	431	301		79	378	205
116	400	238		80	417	301		87	606	200		102	492	188
93	589	245		126	598	232		93	614	388		79	644	219
120	524	188		44	493	309		84	539	183		84	559	389
101	512	387		129	337	363		48	654	213		57	565	387
71	668	232		77	620	187		83	563	211		98	451	398
